# Supplementary material for: Ground-based noontime D-region electron density climatology over northern Norway
Source: Copernicus journal article supplement (doi:10.5194/egusphere-2023-815), 2023-04-25

daily stdev noon Ne / daily median noon Ne - 2014-2022

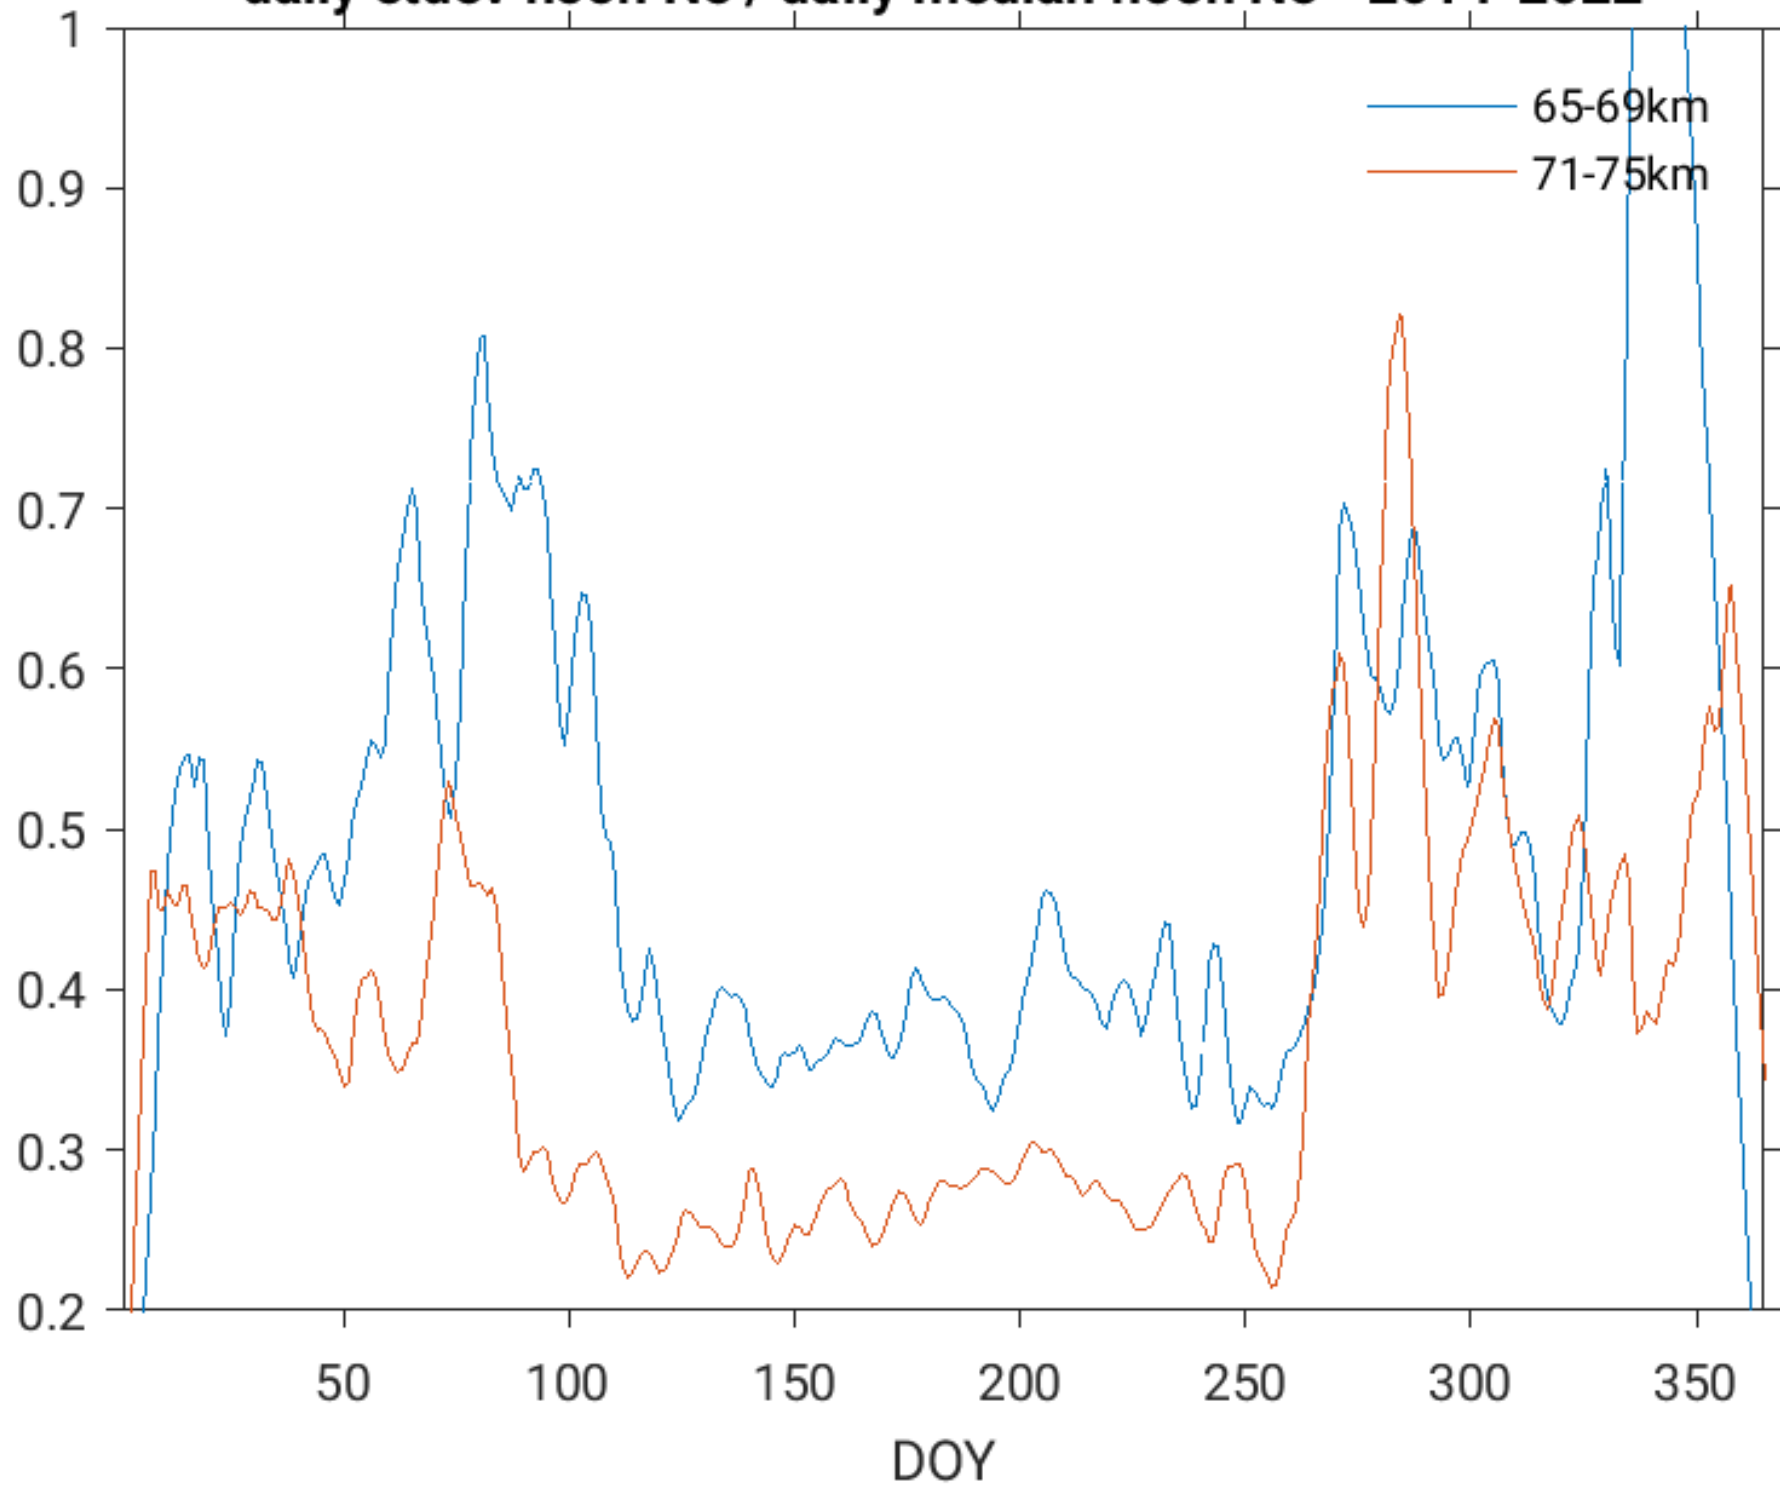

Supplement: Supplementary file [file egusphere-2023-815-AC2-supplement.pdf]
